# Supplementary material for: TAB2 deficiency induces dilated cardiomyopathy by promoting RIPK1-dependent apoptosis and necroptosis
Source: JCI journal article supplement (doi:10.1172/jci152297), 2022-01-06
Supplement: sd1 [file 1]

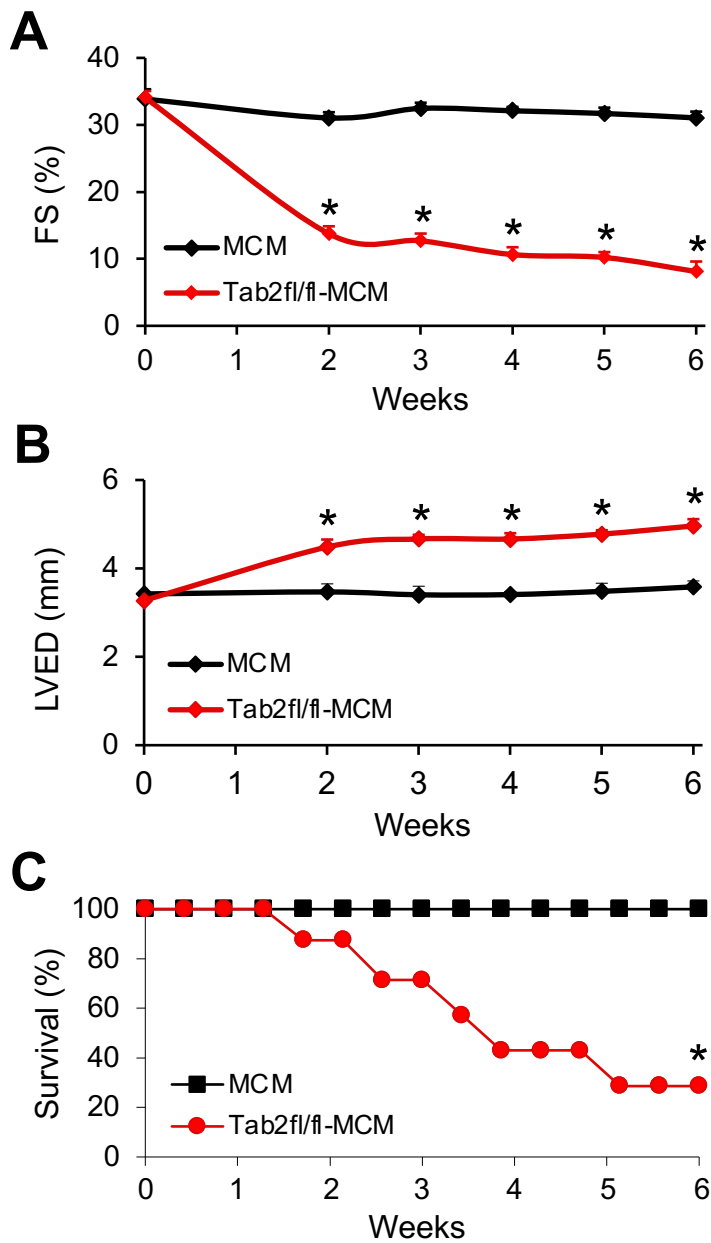

**Supplemental Figure 1. Characterization of *Tab2fl/fl-MerCreMer* mice.** (A and B) Echocardiographic assessment of FS in MerCreMer (MCM) and *Tab2fl/fl-MCM* mice at the indicated time points after tamoxifen administration as described in Methods. \* $P < 0.05$  versus MCM.  $n = 5-7$ . Statistical analysis was performed using two-way ANOVA with Tukey's multiple comparisons test. (C) Survival rate of the indicated mice treated as in A and B. \* $P < 0.05$  versus MCM.  $n = 5-7$ . Statistical analysis was performed using log-rank test.

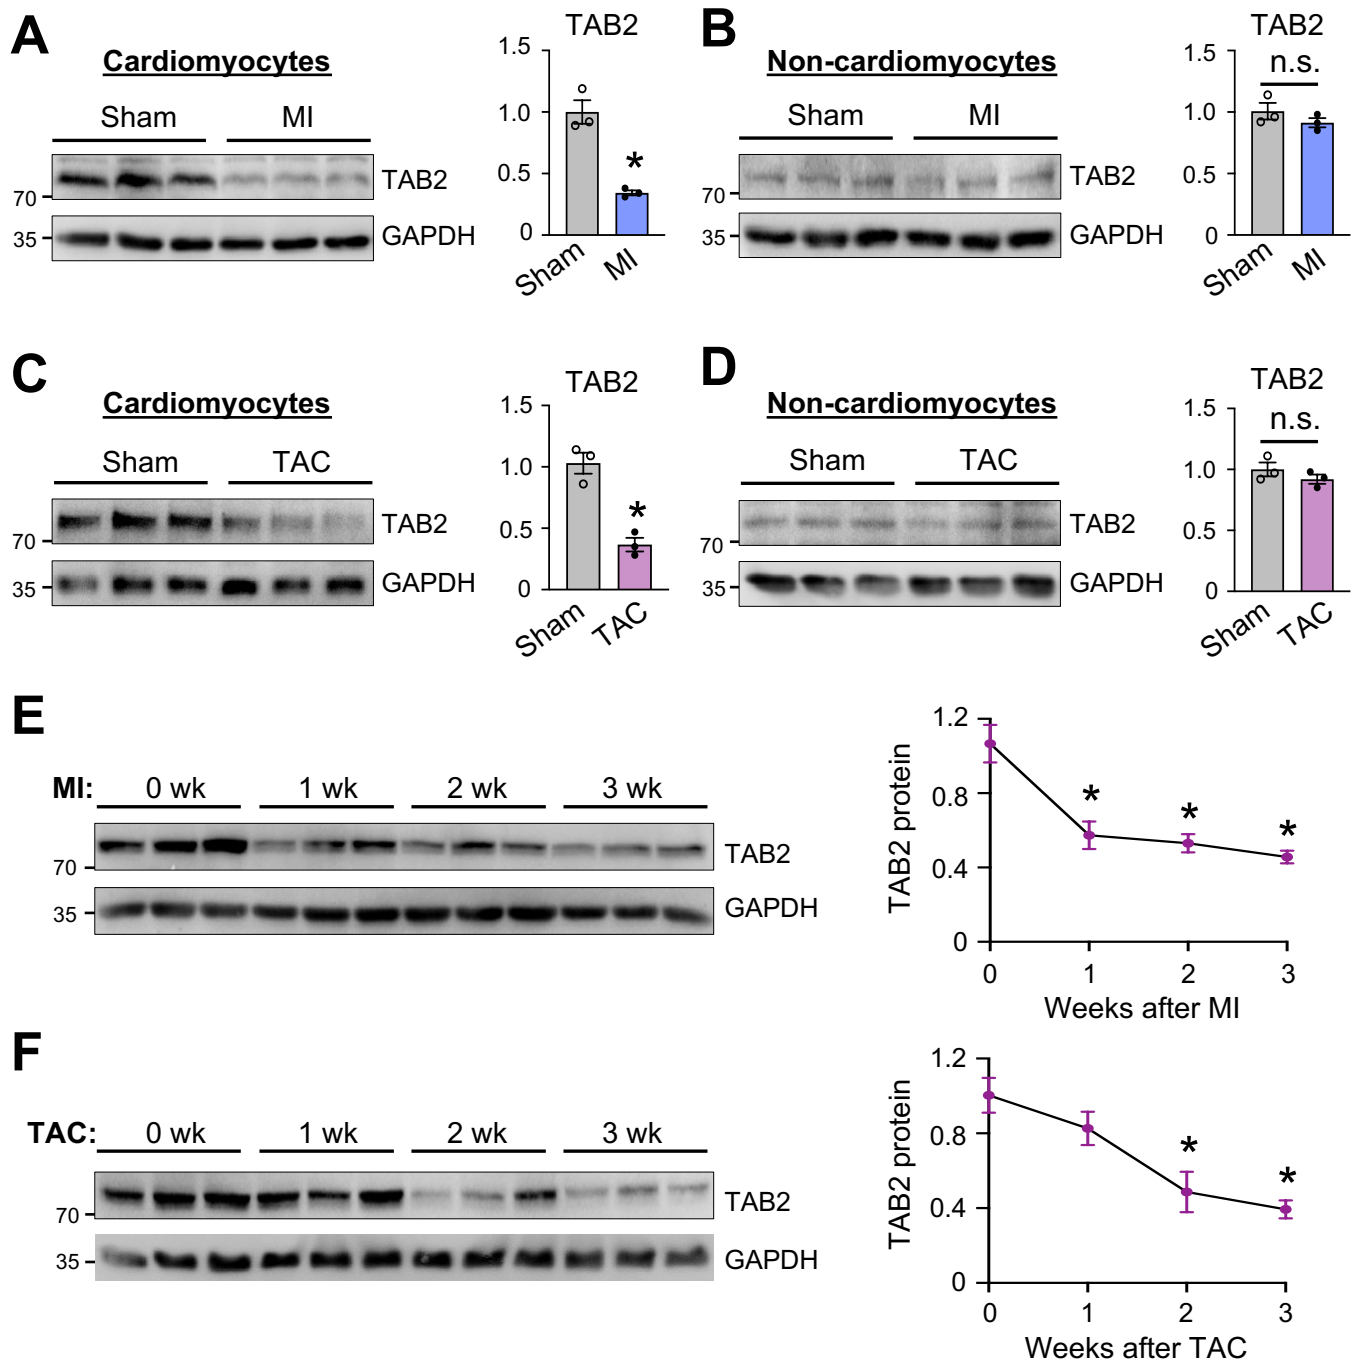

**Supplemental Figure 2. TAB2 was downregulated after pathological stress.** (A and B) Western blot and quantification of TAB2 protein level normalized to GAPDH in adult cardiomyocytes (A) and non-cardiomyocytes (B) from mice subjected to MI or sham surgery for 2 weeks. \* $P < 0.05$  versus Sham.  $n = 3$ . (C and D) Western blot and quantification of TAB2 protein level normalized to GAPDH in cardiomyocytes (C) and non-cardiomyocytes (D) from mice subjected to TAC (28-gauge) or sham surgery for 2 weeks. \* $P < 0.05$  versus Sham.  $n = 3$ . (E) Western blot and quantification of myocardial TAB2 protein level normalized to GAPDH in mice subjected to MI for 0-3 weeks. \* $P < 0.05$  versus 0 week.  $n = 3$ . (F) Western blot and quantification of myocardial TAB2 protein level normalized to GAPDH in mice subjected to TAC (28-gauge) for 0-3 weeks. \* $P < 0.05$  versus 0 week.  $n = 3$ . Data were analyzed by Student's *t* test (A-D) or one-way ANOVA with Tukey's post hoc test (E and F).

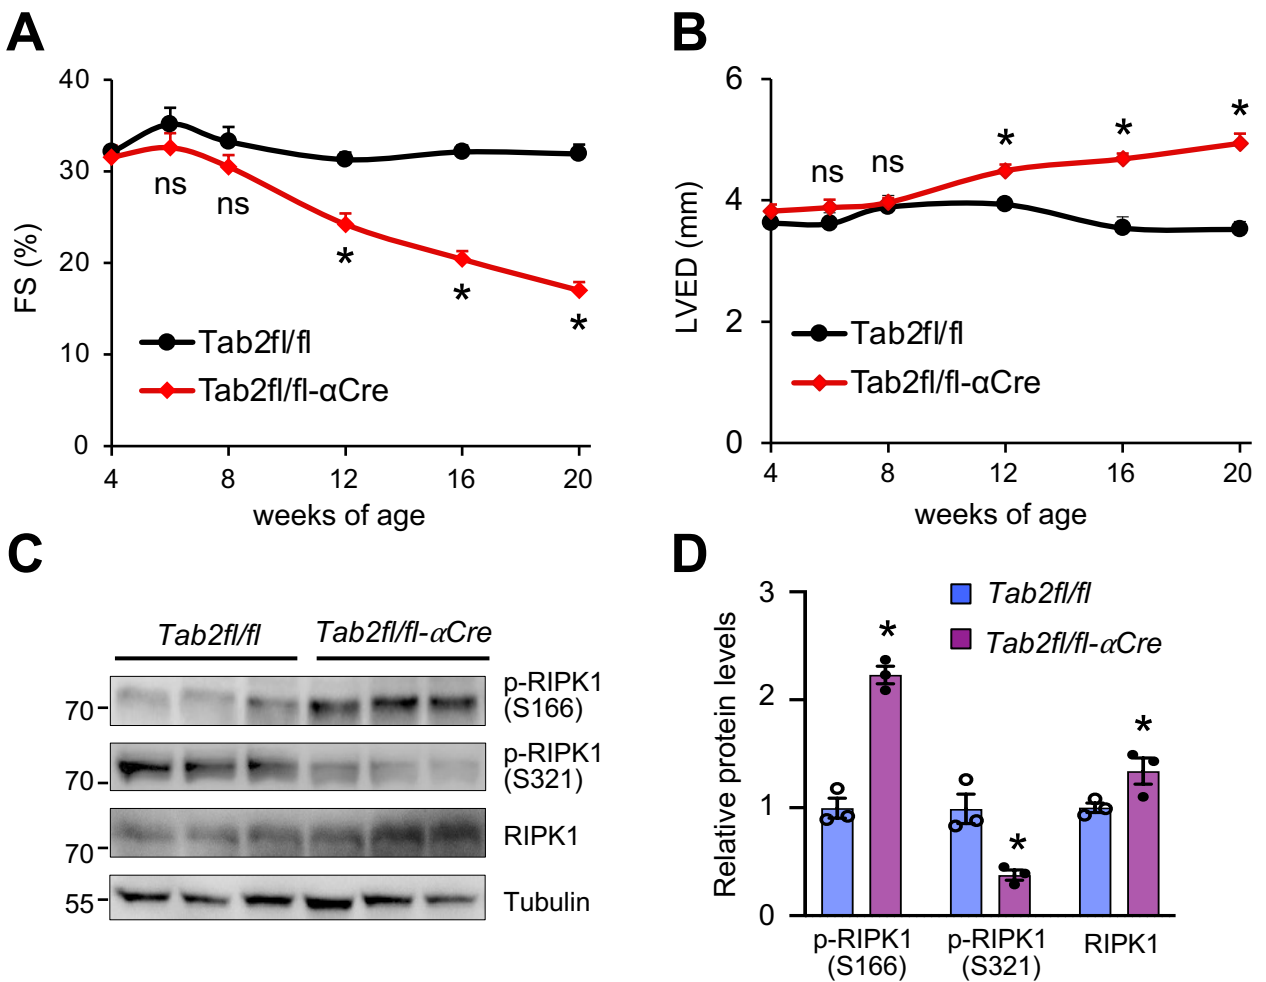

**Supplemental Figure 3. Characterization of *Tab2fl/fl-αMHC-Cre* mice.** (A and B) Echocardiographic assessment of FS (fractional shortening) and LVED (left ventricular end-diastolic dimension) in *Tab2fl/fl* and *Tab2fl/fl-αMHC-Cre* mice of the indicated ages. \* $P < 0.05$  versus *Tab2fl/fl*.  $n = 5$ . ns, non-significant. (C and D) Western blot and quantification of the indicated proteins normalized to  $\alpha$ -Tubulin in cardiac extracts from mice of the indicated genotypes at 20 weeks of age. \* $P < 0.05$  versus *Tab2fl/fl*.  $n = 3$ . Statistical analysis was performed using two-way ANOVA with Tukey's multiple comparisons test (A and B) or Student's t-test (D).

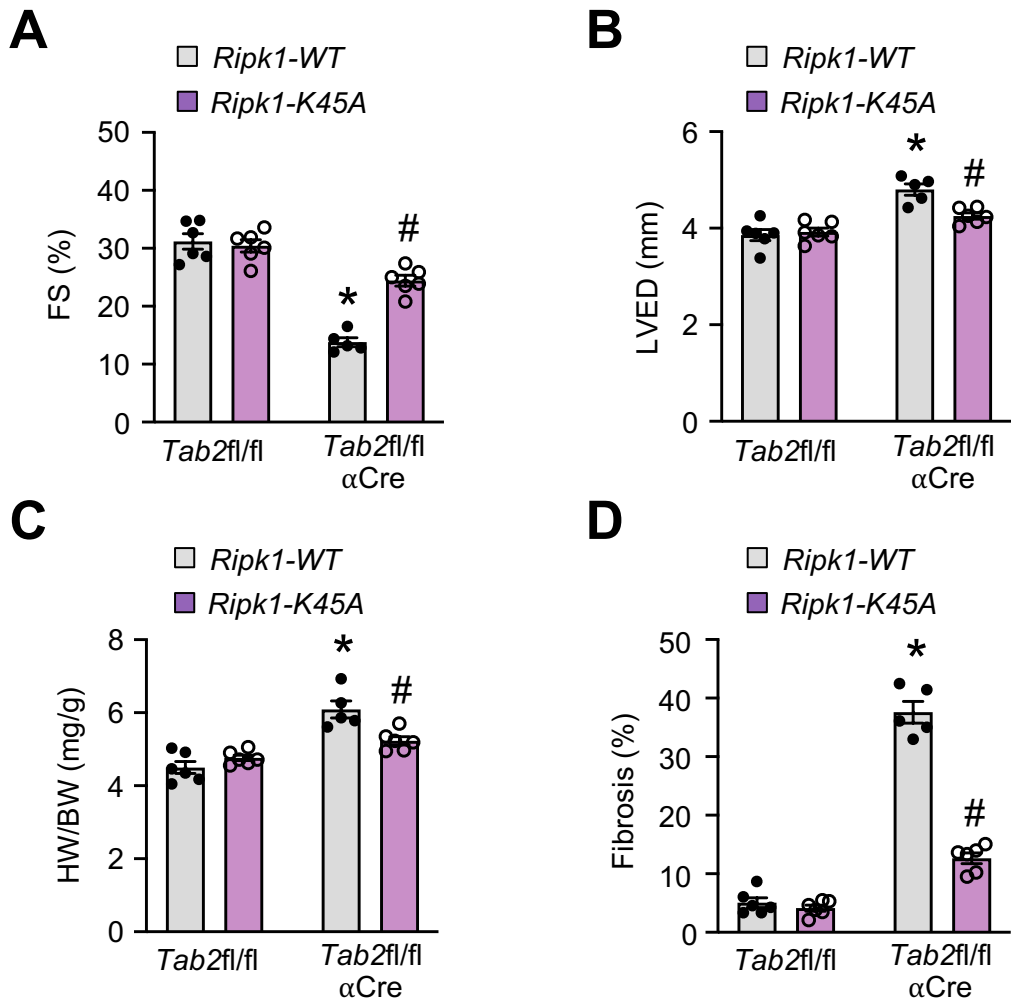

**Supplemental Figure 4. Inactivation of RIPK1 rescues cardiac dysfunction and remodeling in *Tab2fl/fl*- $\alpha$ MHC-Cre mice.** (A and B) Echocardiographic assessment of FS and LVED in mice of the indicated genotypes at 4 months of age. \* $P < 0.05$  versus *Tab2fl/fl*. # $P < 0.05$  versus *Ripk1-WT;Tab2fl/fl*- $\alpha$ Cre.  $n = 5-6$ . (C) Heart weight to body weight ratio (HW/BW) in mice of the indicated genotypes at 4 months of age. \* $P < 0.05$  versus *Tab2fl/fl*. # $P < 0.05$  versus *Ripk1-WT;Tab2fl/fl*- $\alpha$ Cre.  $n = 5-6$ . (D) Quantification of myocardial fibrosis. \* $P < 0.05$  versus *Tab2fl/fl*. # $P < 0.05$  versus *Ripk1-WT;Tab2fl/fl*- $\alpha$ Cre.  $n = 5-6$ . Statistical analysis was performed using 2-way ANOVA with Tukey's post hoc test.

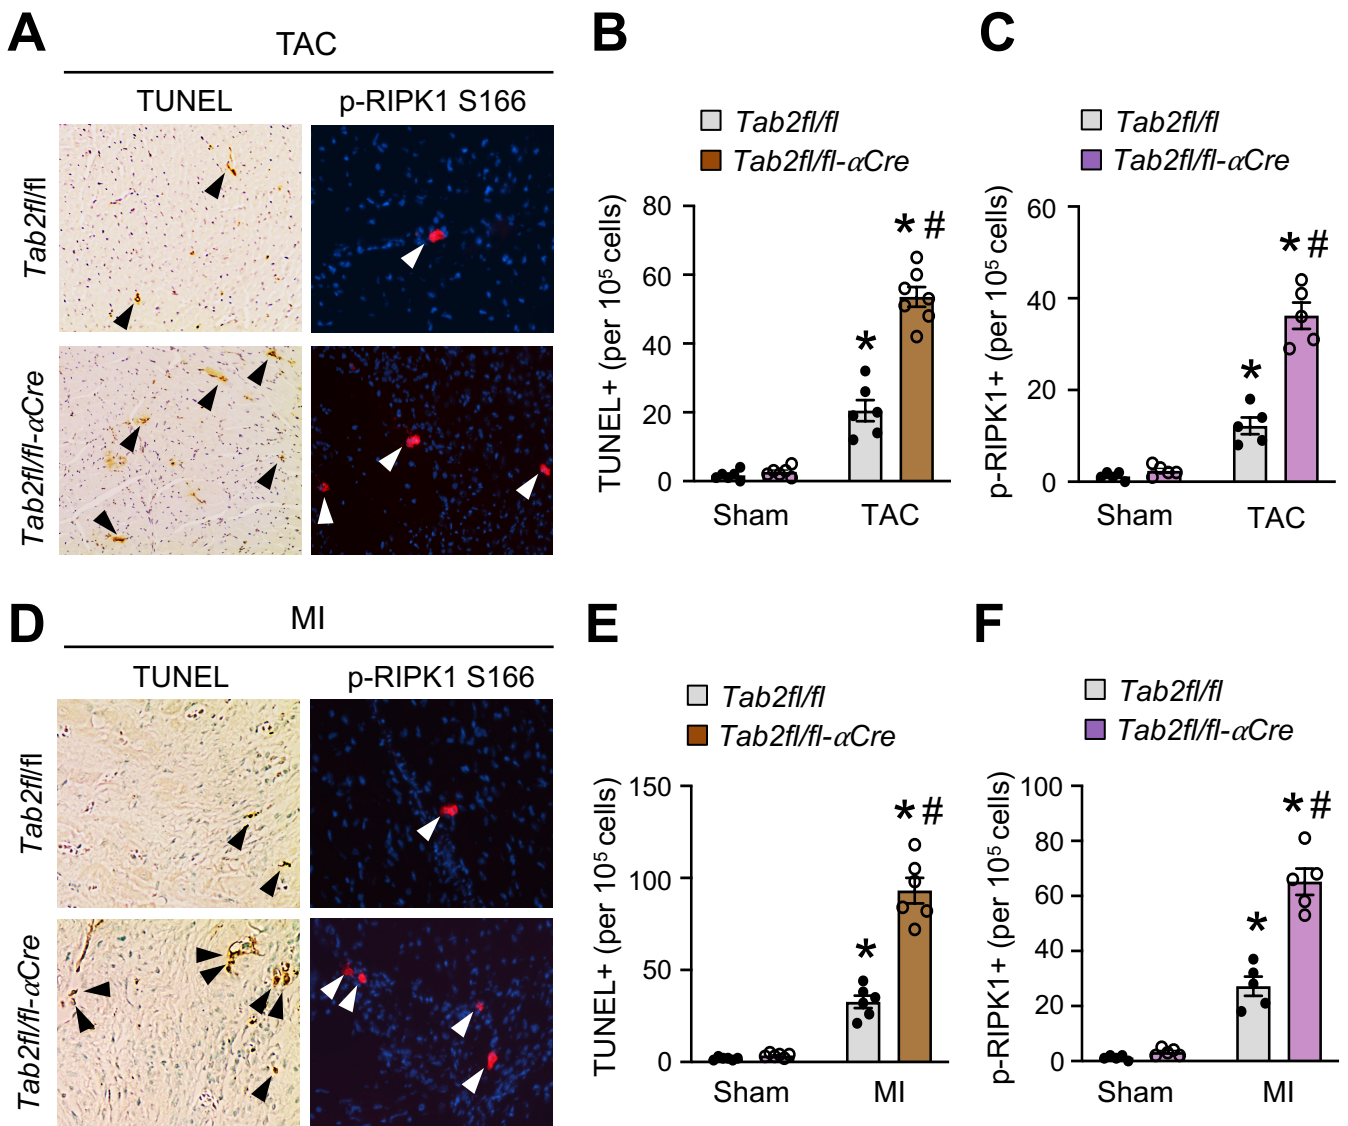

**Supplemental Figure 5. Loss of TAB2 promotes myocardial cell death following pathological stress.** (A) TUNEL assay and immunofluorescence staining for phospho-RIPK1 Ser166 in cardiac sections from mice of the indicated genotypes subjected to TAC for one week. (B and C) Quantification of TUNEL positive cells and phospho-RIPK1 at Ser166 from samples indicated in A. \* $P < 0.05$  versus Sham. # $P < 0.05$  versus *Tab2fl/fl*.  $n = 5-7$ . (D) TUNEL assay and Immunofluorescence staining for phospho-RIPK1 at Ser166 in cardiac sections from mice of the indicated genotypes subjected to MI for one week. (E and F) Quantification of TUNEL positive cells and phospho-RIPK1 at Ser166 from samples indicated in D. \* $P < 0.05$  versus Sham. # $P < 0.05$  versus *Tab2fl/fl*.  $n = 5-6$ . Statistical analysis was performed using two-way ANOVA with Tukey's post hoc test.

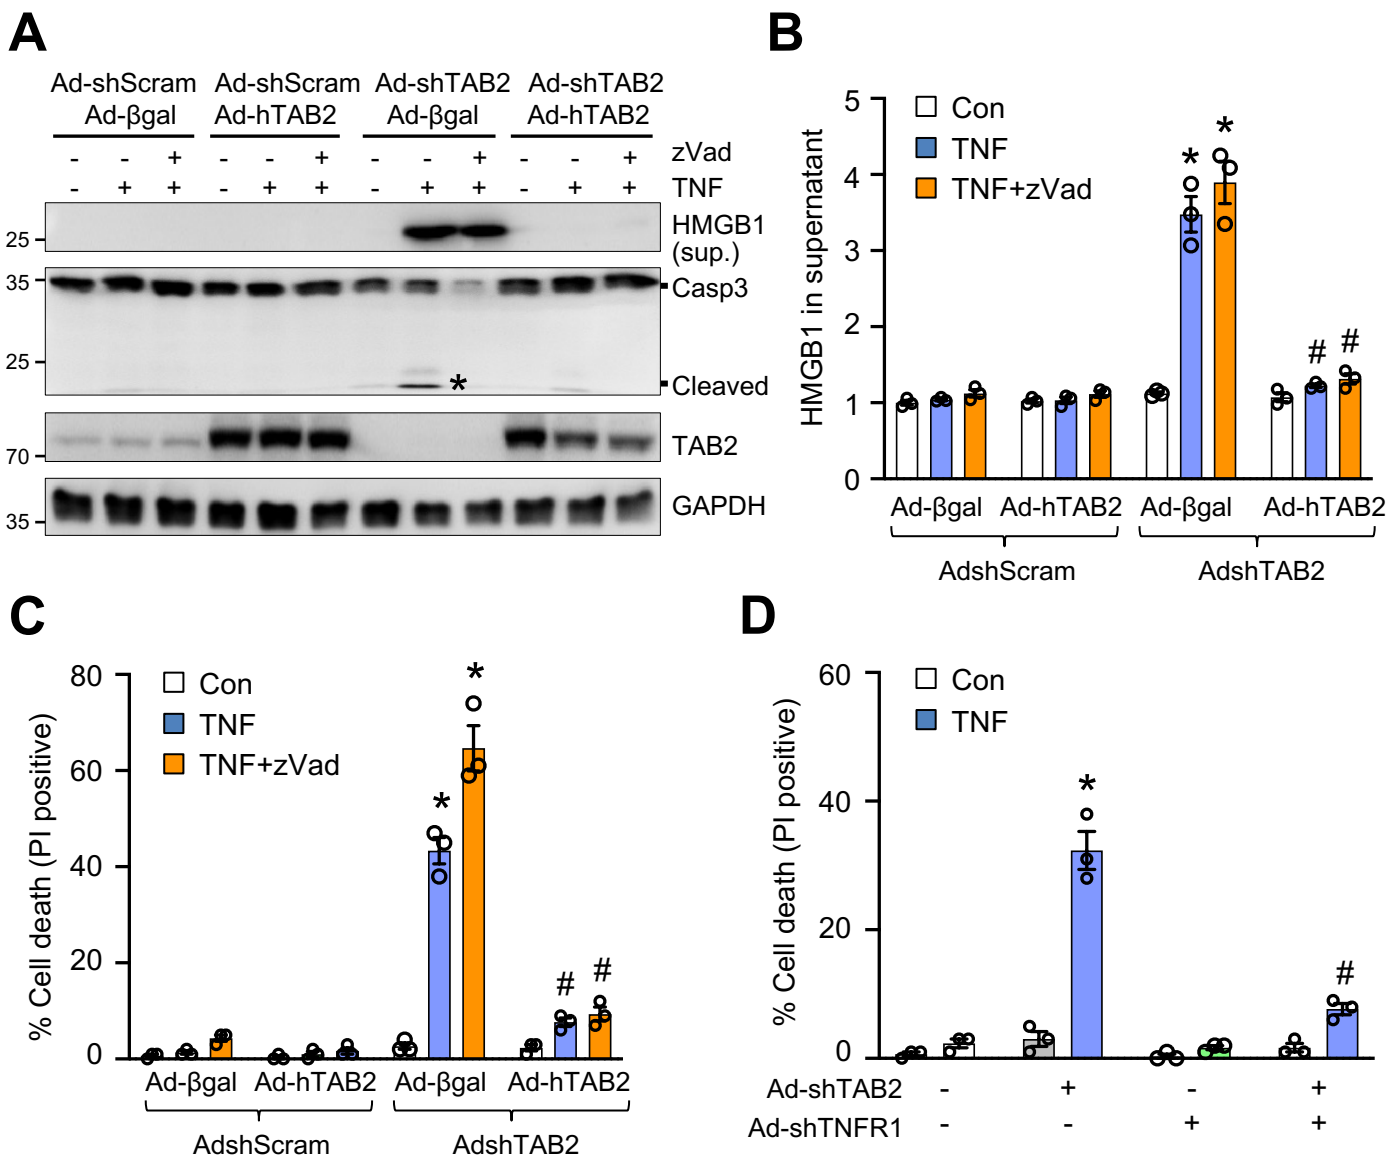

**Supplemental Figure 6. Reconstitution with human TAB2 in TAB2-deficient cardiomyocytes restores cellular resistance to apoptosis and necroptosis.** (A) Western blotting for the indicated proteins in neonatal cardiomyocytes infected with AdshScram or AdshTAB2 for 24 h, followed by infection with Adβgal or Ad-hTAB2 for another 24 h and TNF $\alpha$  stimulation in the presence or absence of zVad-fmk for 6 h. hTAB2 indicates human TAB2. \*indicates cleaved caspase-3. (B) Quantification of HMGB1 in cell culture supernatant as indicated in A. \* $P < 0.05$  versus Con; # $P < 0.05$  versus Ad-shTAB2 Ad-βgal in the corresponding group.  $n = 3$ . (C) Quantification of cell death in cells treated as in A. \* $P < 0.01$  versus Con; # $P < 0.05$  versus Ad-shTAB2 Ad-βgal in the corresponding group.  $n = 3$ . (D) Cell death in neonatal cardiomyocytes infected with the indicated adenoviral vectors for 24 h followed by TNF $\alpha$  stimulation or vehicle control for 6 h. \* $P < 0.01$  versus Con; # $P < 0.05$  versus Ad-shTAB2 TNF.  $n = 3$ . Statistical analysis was performed using 2-way ANOVA with Tukey's post hoc test.

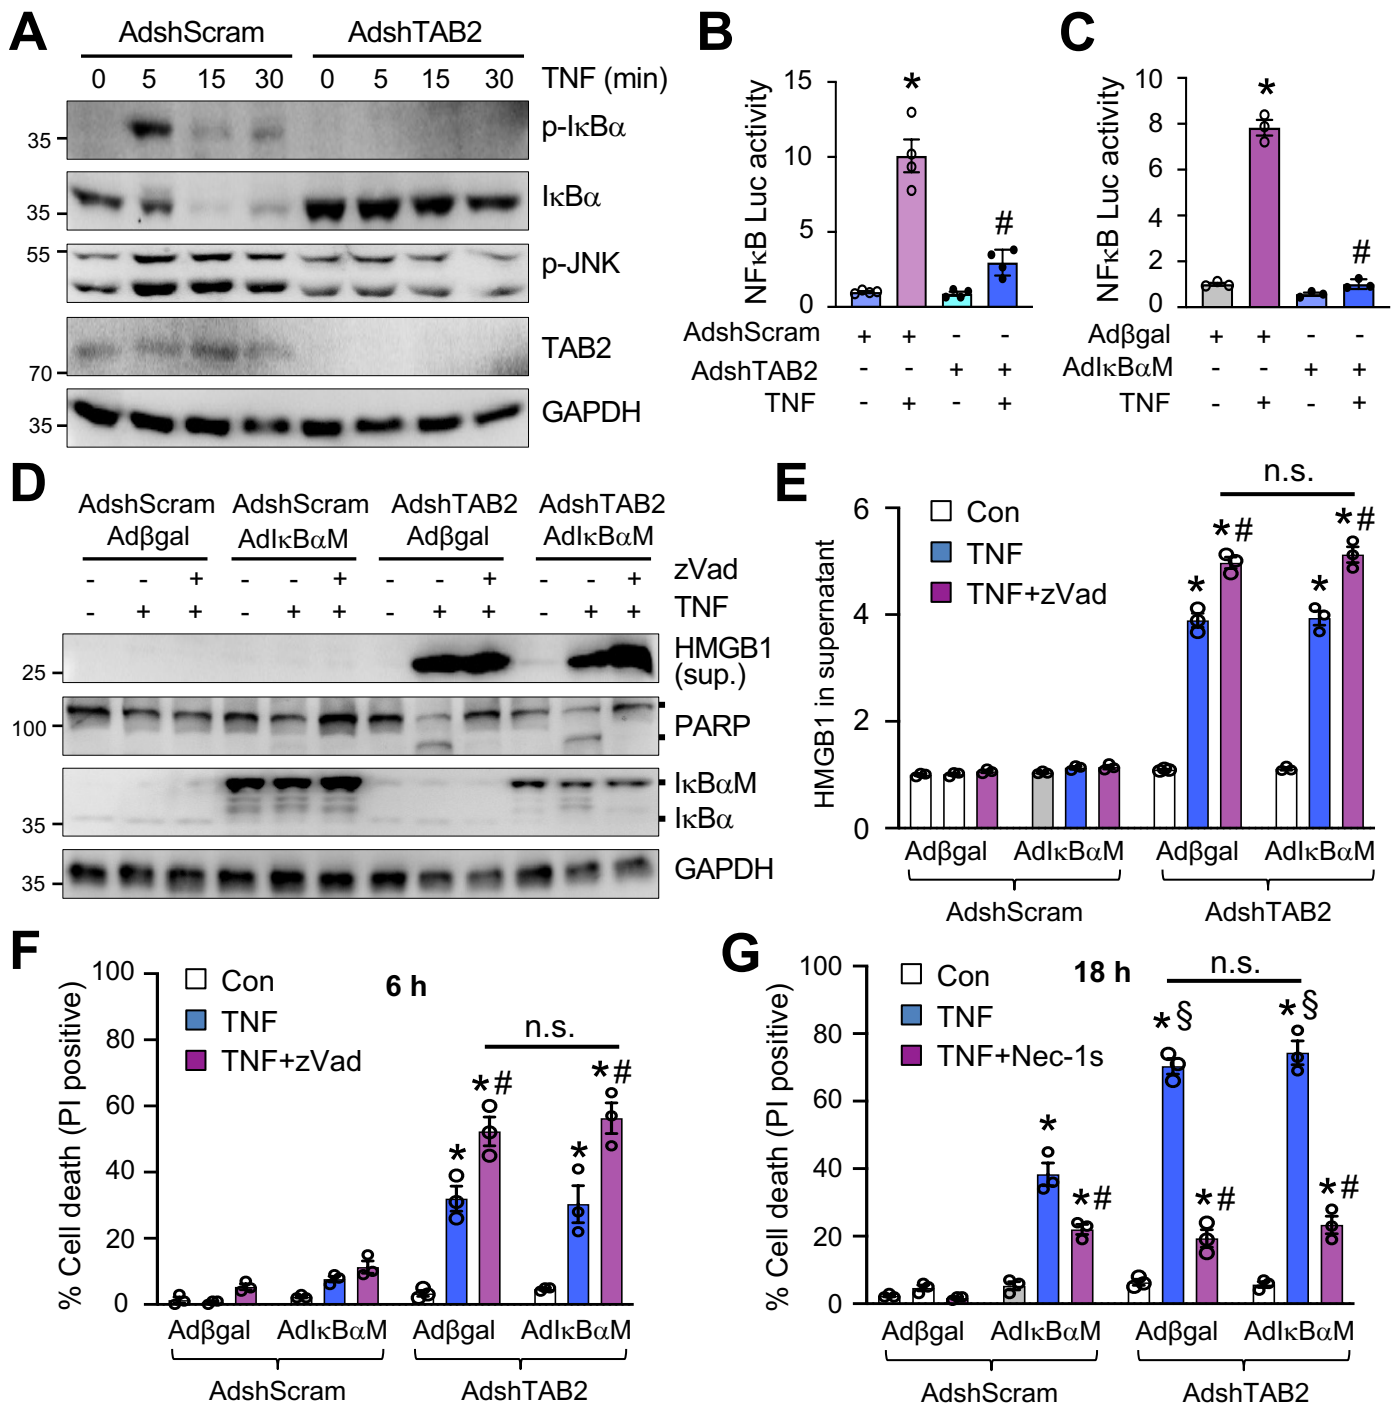

**Supplemental Figure 7. TAB2 regulates apoptosis and necroptosis mainly through an NF $\kappa$ B-independent mechanism.** (A) Western blotting for the indicated proteins in neonatal cardiomyocytes infected with AdshScram or AdshTAB2 for 24 h followed by TNF $\alpha$  stimulation for 0 to 30 min. Data are representative of three independent experiments. (B and C) NF $\kappa$ B luciferase activity in neonatal cardiomyocytes infected with an adenoviral vector encoding NF $\kappa$ B-luciferase reporter along with AdshTAB2 or Ad-IkB $\alpha$ M (IkB $\alpha$  S32/36A mutant) followed by TNF $\alpha$  stimulation for 12 h. \* $P$  < 0.05 versus Control; # $P$  < 0.05 versus Ad-shScram or Ad $\beta$ gal TNF.  $n$  = 3-4. (D) Western blots for the indicated proteins in neonatal cardiomyocytes infected with AdshScram or AdshTAB2 along with Ad-IkB $\alpha$ M followed by TNF $\alpha$  stimulation with or without zVad-fmk for 6 h. (E) Quantification of HMGB1 in supernatant as indicated in D. (F and G) Quantification of cell death in neonatal cardiomyocytes treated as indicated for 6 h (F) or 18 h (G). \* $P$  < 0.05 versus Con; # $P$  < 0.05 versus TNF in the corresponding group. § $P$  < 0.05 versus AdIkB $\alpha$ M AdshScram TNF. n.s., non-significant.  $n$  = 3. Statistical analysis was performed using 2-way ANOVA with Tukey's post hoc test.

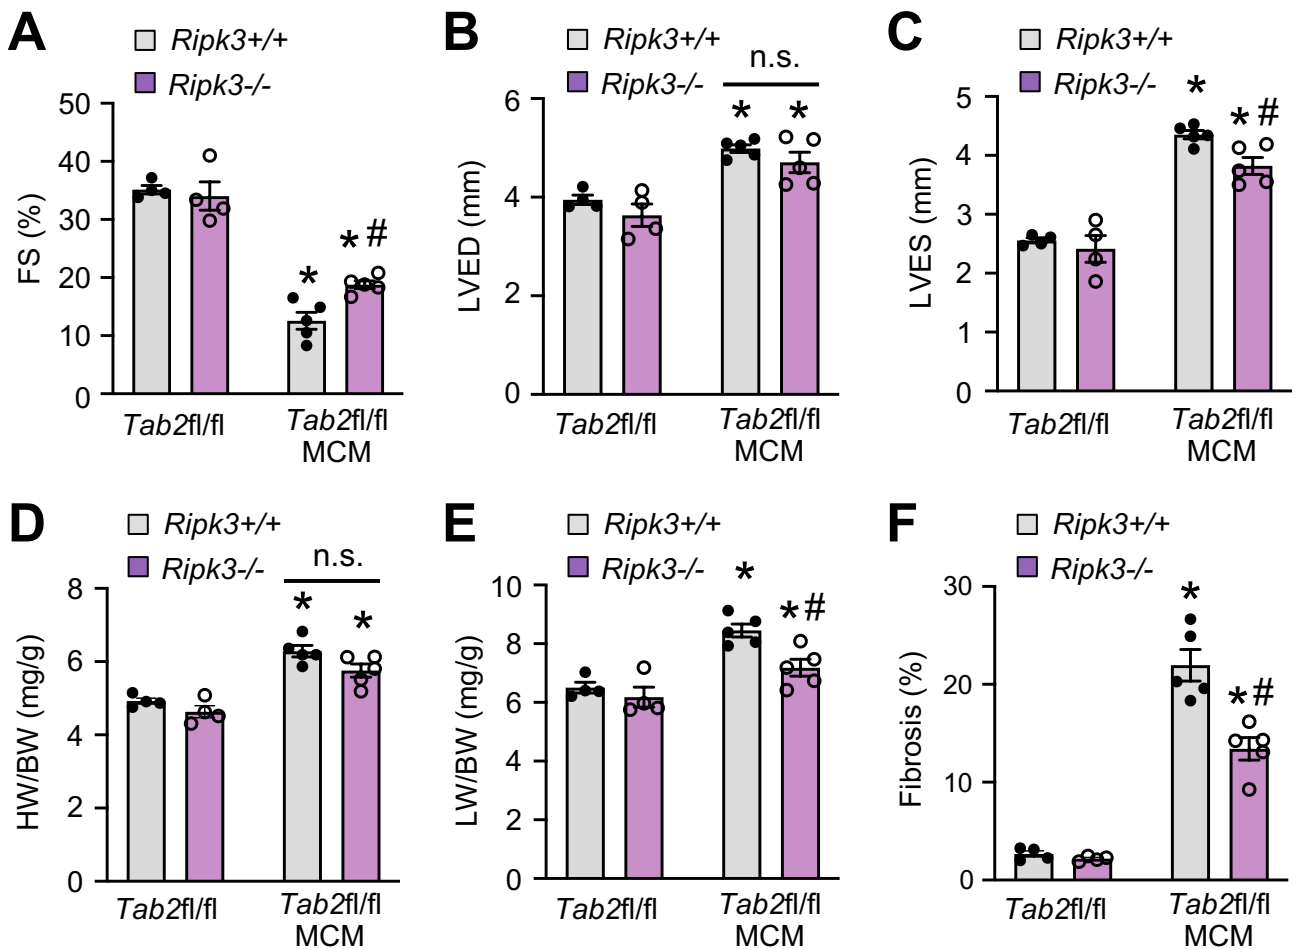

**Supplemental Figure 8. Ablation of RIPK3 partially rescues cardiac remodeling and dysfunction in TAB2-deficient mice.** (A-C) Echocardiographic assessment of FS, LVED, and LVES in mice of the indicated genotypes 2 weeks after tamoxifen treatment. \* $P < 0.05$  versus *Tab2fl/fl*. # $P < 0.05$  versus *Ripk3+/+;Tab2fl/fl*-MCM. n.s., non-significant.  $n = 4-5$ . (D) Heart weight to body weight ratio (HW/BW) in mice of the indicated genotypes. \* $P < 0.05$  versus *Tab2fl/fl*. n.s., non-significant.  $n = 4-5$ . (E) Lung weight to body weight ratio (LW/BW) in mice of the indicated genotypes. \* $P < 0.05$  versus *Tab2fl/fl*. # $P < 0.05$  versus *Ripk3+/+;Tab2fl/fl*-MCM.  $n = 4-5$ . (F) Quantification of myocardial fibrosis. \* $P < 0.05$  versus *Tab2fl/fl*. # $P < 0.05$  versus *Ripk3+/+;Tab2fl/fl*-MCM.  $n = 4-5$ . Statistical analysis was performed using 2-way ANOVA with Tukey's post hoc test.



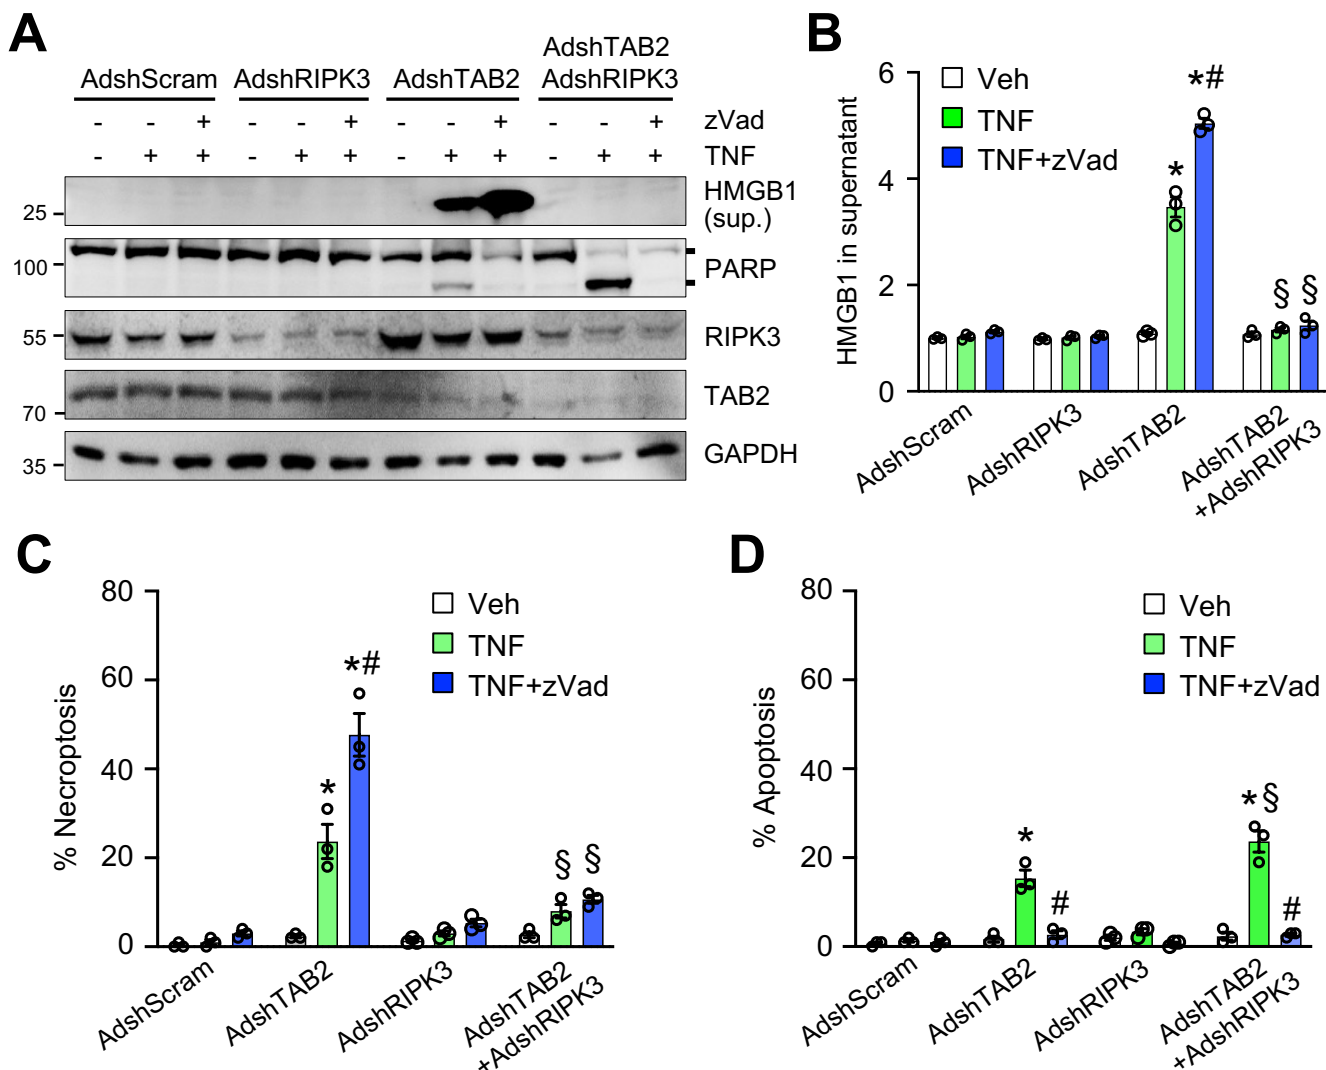

**Supplemental Figure 9. Ablation of RIPK3 inhibits necroptosis but mildly increases apoptosis in TAB2-deficient cardiomyocytes.** (A) Western blotting for the indicated proteins in neonatal cardiomyocytes infected with AdshScram or AdshTAB2 in the presence or absence of an adenovirus encoding RIPK3 shRNA (Ad-shRIPK3) followed by treatment with vehicle control, TNF $\alpha$ , or TNF $\alpha$ +zVad-fmk for 6 h. (B) Quantification of HMGB1 in culture supernatant as indicated in A. \* $P < 0.05$  versus Con; # $P < 0.05$  versus Ad-shTAB2 TNF; § $P < 0.05$  versus Ad-shTAB2 in the corresponding group.  $n = 3$ . (C) Quantification of necroptosis (PI+/Annexin V+) from cells treated as in A. \* $P < 0.05$  versus Con; # $P < 0.05$  versus Ad-shTAB2 TNF; § $P < 0.05$  versus Ad-shTAB2 in the corresponding group.  $n = 3$ . (D) Quantification of apoptosis (PI-/Annexin V+ with chromatin condensation) from cells treated as in A. \* $P < 0.05$  versus Con; # $P < 0.05$  versus TNF in the corresponding group; § $P < 0.05$  versus Ad-shTAB2 TNF.  $n = 3$ . Statistical analysis was performed using 2-way ANOVA with Tukey's post hoc test.
